# Supplementary material for: A tetrathiafulvalene–l-glutamine conjugated derivative as a supramolecular gelator for embedded C60 and absorbed rhodamine B
Source: Royal Society of Chemistry journal article supplement (doi:10.1039/d0nj01816c), 2020-01-01
Supplement: d0nj01816c1.pdf [file d0nj01816c1.pdf]

## Supporting Information for

Tetrathiafulvalene-L-glutamine conjugated derivative as supramolecular  
gelator for embedded C<sub>60</sub> and absorbed rhodamine B

Yucun Liu,<sup>\*ab</sup> Zhixue Liu,<sup>b</sup> Yuan Wang,<sup>c</sup> Lili Zhang,<sup>b</sup> Xuemei Jiang<sup>b</sup>

and Guangbo Che<sup>\*a</sup>

- a. Key Laboratory of Preparation and Application of Environmental Friendly Materials (Jilin Normal University), Ministry of Education, Changchun, 130103, China. E-mail: liuyc7889@jlnu.edu.cn; guangboche@jlnu.edu.cn.
- b. College of Chemistry, Jilin Normal University, Siping, 136000, China.
- c. Beijing National Laboratory for Molecular Science, CAS Key Laboratory of Colloid Interface and Chemical Thermodynamics, Institute of Chemistry, Chinese Academy of Sciences, Beijing 100190, P.R. China.

## 1. Additional data

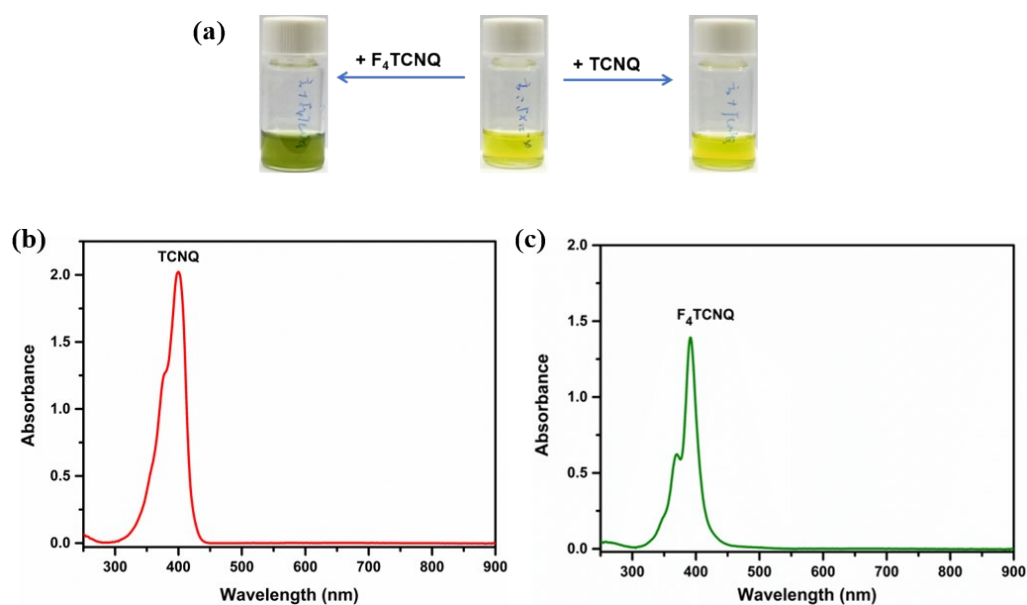

**Figure S1.** (a) The color changes of the gelator in CH<sub>2</sub>Cl<sub>2</sub> solution after the addition of 1.0 equivalent of TCNQ and F<sub>4</sub>TCNQ, and the UV-Vis spectra of the TCNQ (b) and F<sub>4</sub>TCNQ (c) in CH<sub>2</sub>Cl<sub>2</sub> solution (the concentration was  $5 \times 10^{-5}$  M, respectively).

**Table S1.** The gelation behavior of the gelator.

| Solvent                         | Phase           | CGC (mg/mL) <sup>b</sup> |
|---------------------------------|-----------------|--------------------------|
| <i>n</i> -hexane                | TG <sup>a</sup> | 8.5                      |
| Cyclohexane                     | TG              | 9.5                      |
| Benzene                         | CG              | 10.5                     |
| Toluene                         | CG              | 10.0                     |
| CH <sub>2</sub> Cl <sub>2</sub> | OG              | 18.5                     |
| Ethyl acetate                   | P               | —                        |
| THF                             | P               | —                        |
| DMSO                            | P               | —                        |
| DMF                             | P               | —                        |
| CH <sub>3</sub> CN              | IS              | —                        |
| Methanol                        | IS              | —                        |
| Ethanol                         | IS              | —                        |

<sup>a</sup>: TG: Translucent gel, CG: Clear gel, OG: Opaque gel, P: Precipitation, IS: Insoluble.

<sup>b</sup>: CGC: Critical gelation concentration.

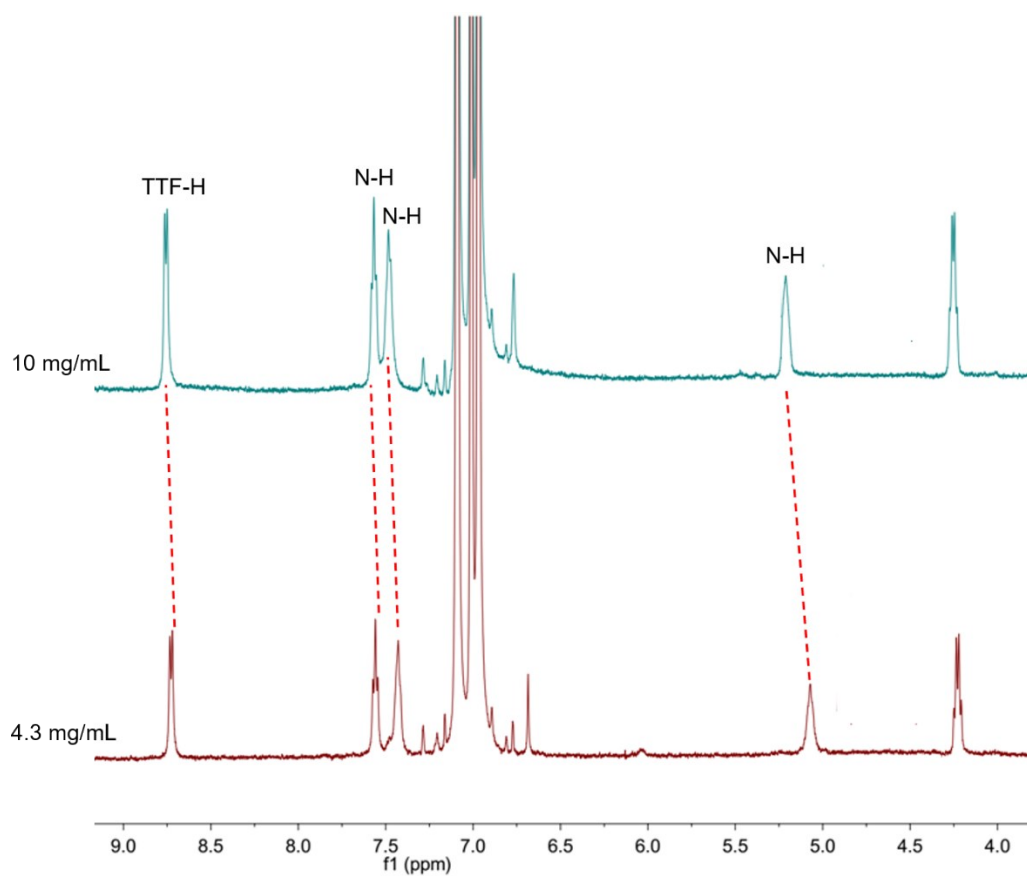

**Figure S2.** Concentration-dependent  $^1\text{H}$  NMR spectra of **1** in  $[\text{D}_8]$ toluene.

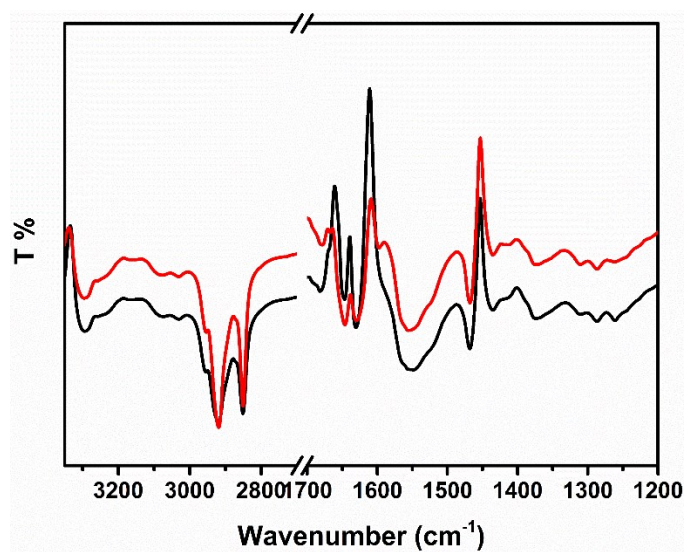

**Figure S3.** FT-IR spectra of the native xerogels prepared from **1** in cyclohexane (black line) and benzene (red line).

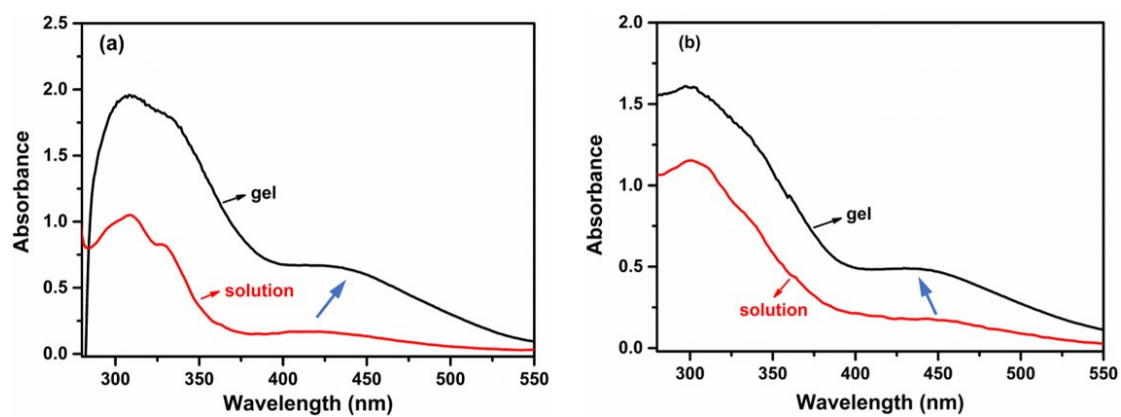

**Figure S4.** UV-Vis spectra of the gelator **1** in the solution and gel states prepared in toluene (a) and *n*-hexane (b).

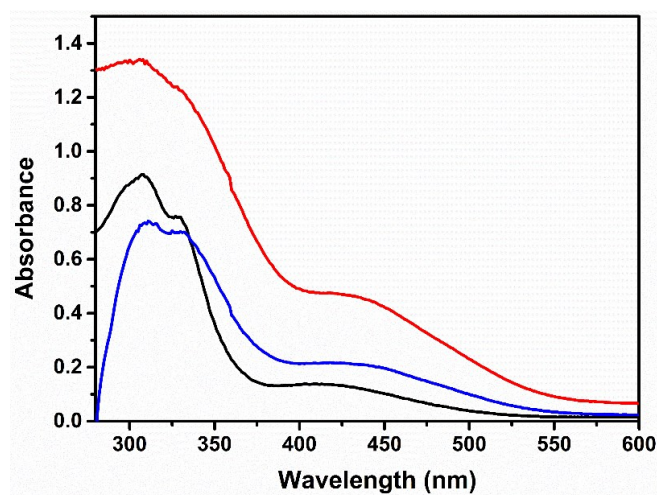

**Figure S5.** UV-Vis spectra of the gelator **1** in CH<sub>2</sub>Cl<sub>2</sub> solution (black line) and the gels formed in cyclohexane (red line) and benzene (blue line).

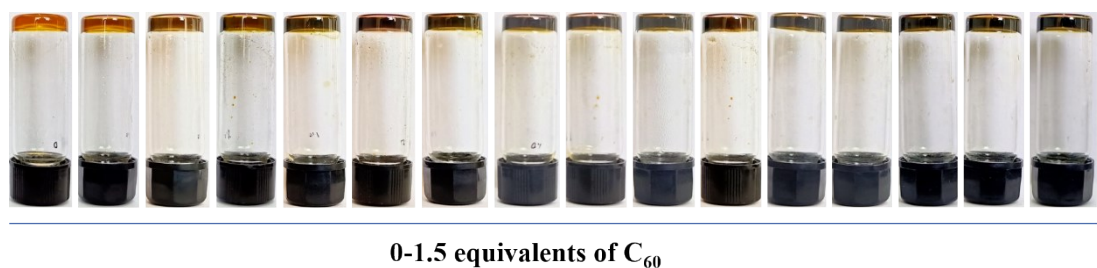

**Figure S6.** The color of the binary gel containing 0-1.5 equivalents of C<sub>60</sub>.

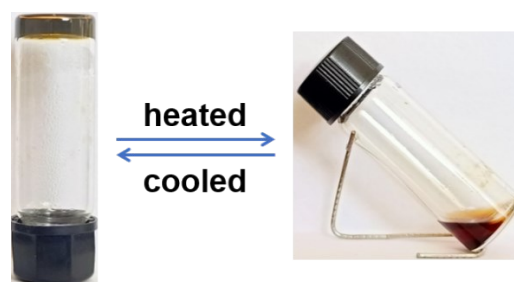

**Figure S7.** The thermal reversibility of the CT complex gel containing 1.0 equivalent of  $C_{60}$ .

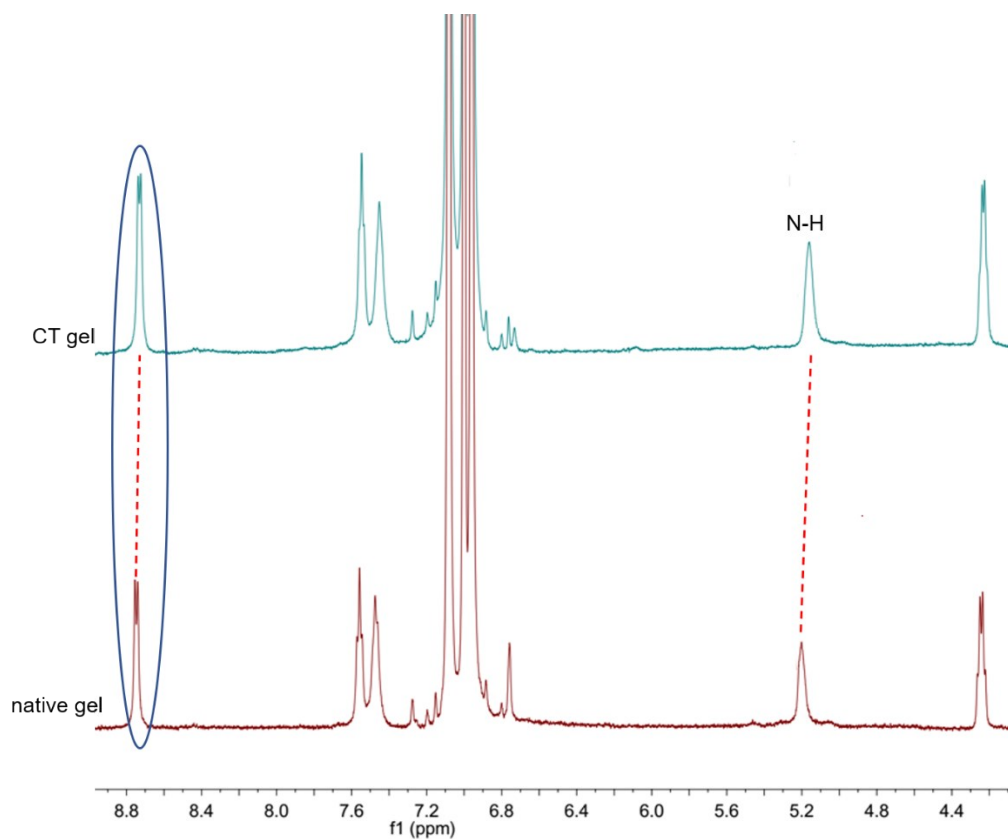

**Figure S8.**  $^1H$  NMR spectra of **1** (10 mg/mL) in native gel and CT complex gel with 1.0 equivalent of  $C_{60}$  in  $[D_8]$ toluene.

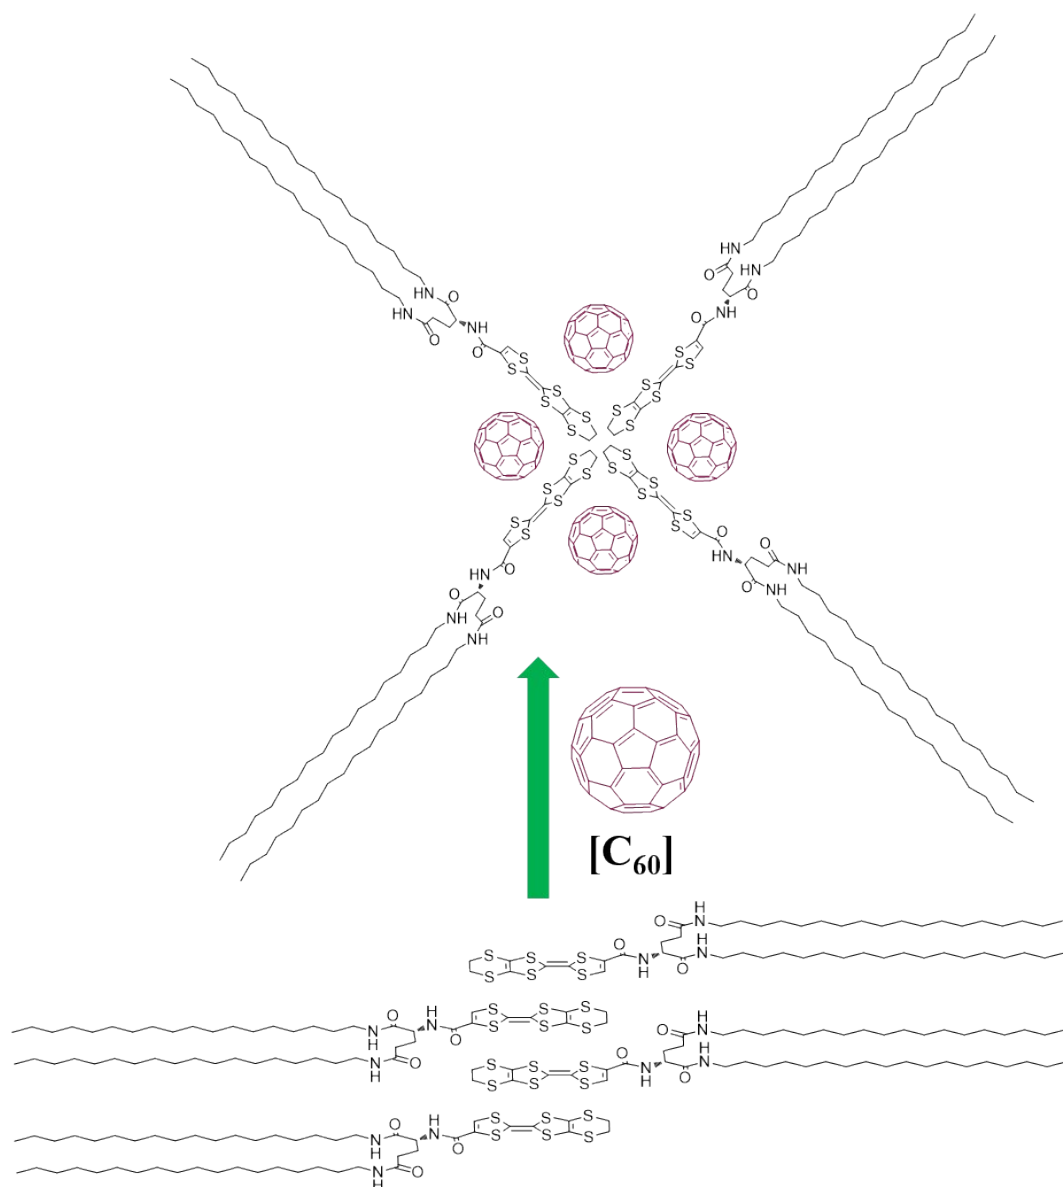

**Figure S9.** Cartoon representation of the possible changes of the molecular packing model for **1** in the toluene gel with C<sub>60</sub>.

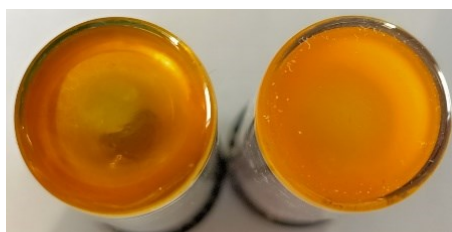

**Figure S10.** The transparency changes of toluene gel before and after adsorption of rhodamine B.

## 2. Structural characterization

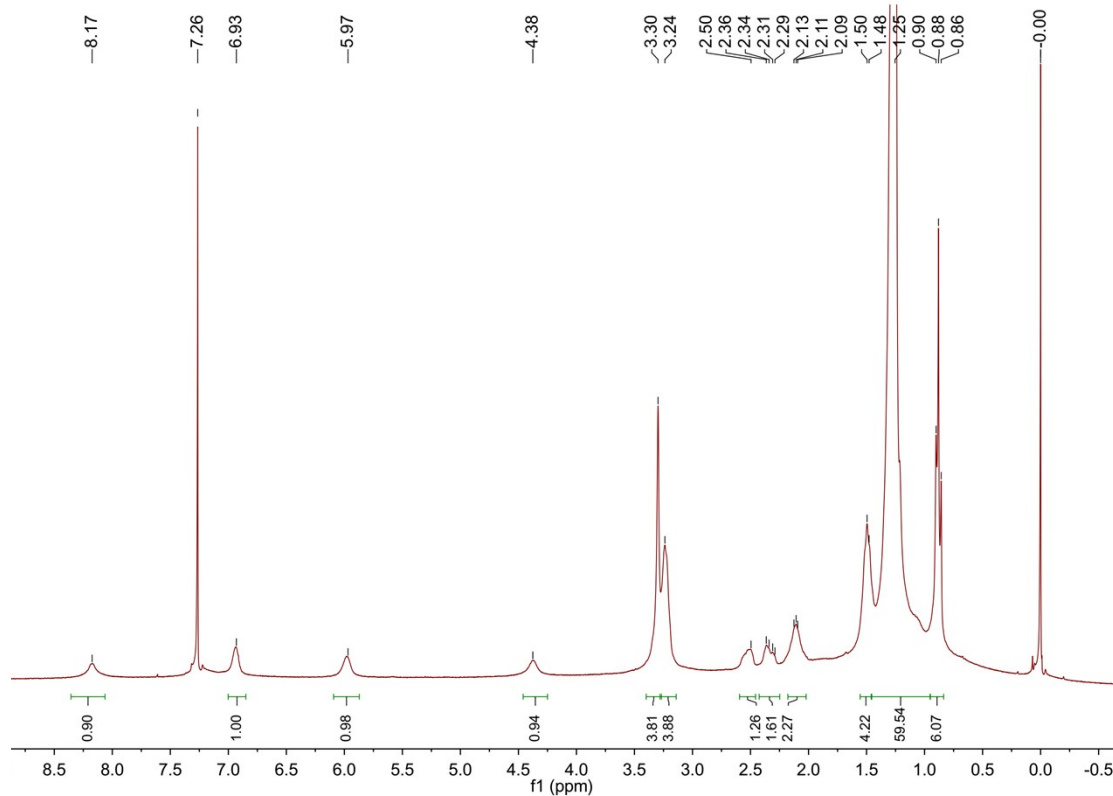

$^1\text{H-NMR}$  of the gelator 1

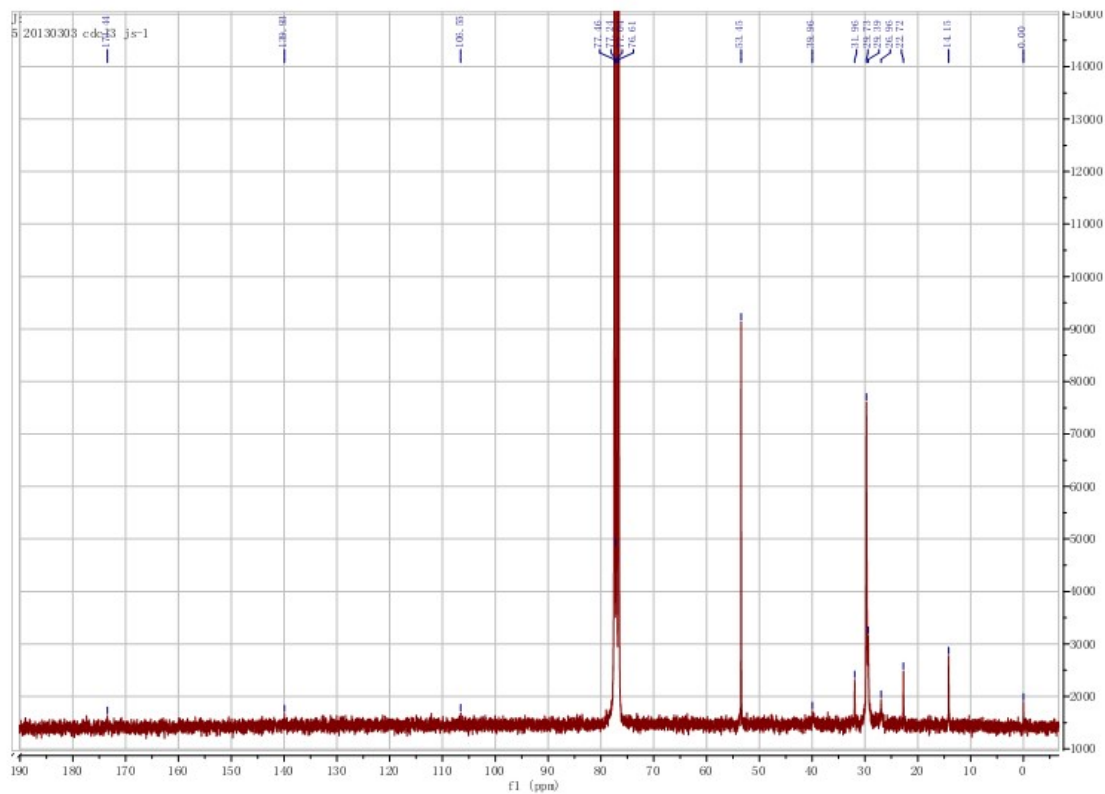

# <sup>13</sup>C-NMR of the gelator 1

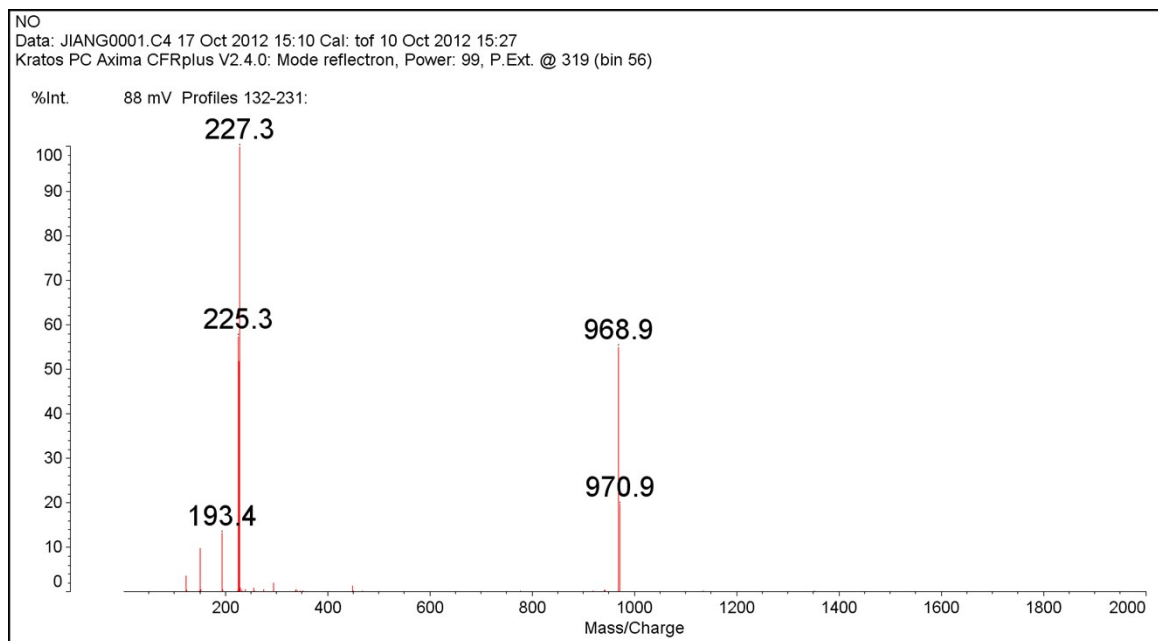

MALDI-TOF-MS of the gelator 1
